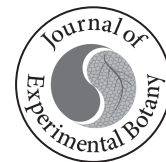

RESEARCH PAPER

# A novel inversion in the chloroplast genome of marama (*Tylosema esculentum*)

Yunsoo Kim and Christopher Cullis\*

Department of Biology, Case Western Reserve University, Cleveland, OH 44106, USA

\* Correspondence: [cac5@case.edu](mailto:cac5@case.edu)

Received 3 November 2016; Editorial decision 14 December 2016; Accepted 14 December 2016

Editor: Christine Foyer, Leeds University

## Abstract

*Tylosema esculentum* (marama bean) is being developed as a possible crop for resource-poor farmers in arid regions of Southern Africa. As part of the molecular characterization of this species, the chloroplast genome has been assembled from next-generation sequencing using both Illumina and Pac-Bio data. The genome is of typical organization with a large single-copy region and a small single-copy region separated by a pair of inverted repeats and covers 161 537 bp. It contains a unique inversion not present in any other legumes, even in the closest relatives for which the complete chloroplast genome is available, and two complete copies of the *ycf1* gene. These data extend the range of variability of legume chloroplast genomes. The sequencing of multiple individuals has identified two different chloroplast genomes which were geographically separated. The current sampling is limited so that the extent of the intraspecific variation is still to be determined, leaving open the question of legume chloroplast genomes adapted to particular arid environments.

**Key words:** Basal legume, chloroplast genome sequence, intraspecific variation, marama, unique inversion.

## Introduction

The marama bean [*Tylosema esculentum* (Burchell) Schreiber] is a wild tuber-producing and non-nodulating basal legume that grows in arid regions of Southern Africa and has been identified as an orphan crop (National Research Council, 1996). The species is being investigated as a possible crop with the potential to contribute to the food security of resource-poor farmers (Chimwamurombe, 2008; Nepolo *et al.*, 2009).

Marama is one of the basal legumes in the *Caesalpinioideae*, in the tribe *Cercideae*, which is subdivided into two subtribes, the *Cercidinae* and *Bauhiniinae*. *Tylosema* was originally classified within in the genus *Bauhinia* (Hao *et al.*, 2003) but then was reclassified as a separate clade within the *Bauhiniinae* (Wunderlin, 2010). The relationships between the species have been subject to both palynological and molecular analyses, the latter especially with the use of chloroplast markers such as the *matK* gene (Hao *et al.*, 2003; Banks *et al.*, 2013).

The characterization of both the genetic and phenotypic variability is an important component of the domestication process. Earlier studies on marama using various DNA marker systems including rDNA (Nepolo *et al.*, 2010) and simple sequence repeats/microsatellites (SSRs) (Takundwa *et al.*, 2010) have demonstrated that the marama bean has a high intrapopulation diversity and a low interpopulation diversity. In addition, the chloroplast *matK* gene was used to construct a phylogenetic tree including marama and shown to be useful for determining levels of genetic variation (Takundwa *et al.*, 2012).

The organization of the plastome is highly conserved in most flowering plants (Jansen and Ruhlman, 2012), with the structure usually having a large and a small single-copy region separated by a pair of inverted repeats. The chloroplast genomes in the legumes are very varied. Two of the major variants are the loss

of one copy of the inverted repeat and a 50 kb inversion (Doyle *et al.*, 1996). In addition, lupin has a 36 kb inversion within this 50 kb inversion (Martin *et al.*, 2014). This considerable atypical plastome variation makes them an emerging model system to investigate aspects of plastome evolution (Dugas *et al.*, 2015). Although there are >60 complete chloroplast genomes reported from the legumes, most are from the Papilionoideae. The few from other clades includes that for *Acacia ligulata* in the Mimosoideae (Williams *et al.*, 2015) and one from the Caesalpinioideae (for *Cercis canadensis*), so this study adds knowledge on the variation of the chloroplast genome for the basal legumes.

High-throughput next-generation sequencing has been applied to marama with data from both the short read Illumina platform as well as the long read PacBio platform. These data have been used to assemble the complete marama chloroplast genome. The overall organization is as expected, with large and small single copy regions separated by a pair of inverted repeats. As expected from the taxonomic position of this species as a basal legume, the large (50 kb) inversion is absent from the marama chloroplast genome as it is from the most closely related clades, namely the Caesalpinioid crown clade, ADA clade, Swartzoid clade, and the Cladrastis clade (Martin *et al.*, 2014). However, a major structural difference, a unique inversion of 7500 bp which is absent from all the other legume chloroplasts sequenced to date, has been identified.

In this study, the complete chloroplast genome of marama has initially been assembled and characterized for a single individual. Following the assembly of the first chloroplast genome, next-generation sequencing data from eight other individuals were aligned to this chloroplast assembly. These data have identified a second form of the chloroplast genome. All of these eight individuals, from a collection at the University of Pretoria farm, had identical chloroplast genomes that differed from the first assembly in 94 single nucleotide polymorphisms (SNPs) and 77 indels, and is consistent with different chloroplast genomes being distributed geographically.

## Materials and methods

### Plant material

Nine different individuals were sampled. Six were growing long term at the University of Pretoria Farm. Three seeds, two collected from different plants at the UP farm, and one from Namibia were germinated in sand and grown in a greenhouse. DNA from all the samples was extracted from young leaves.

### DNA extraction and estimation

Young leaves from the growing tip of each of the nine plants were collected and total DNA extracted using the Qiagen Plant miniprep kit. The leaves were ground in a mortar with acid-washed sand to ensure cell breakage. All other steps were as per the manufacturer's protocol. The DNA yield and quality was determined both by using a NanoDrop spectrophotometer and by electrophoresing 5 µl of the extracted DNA on a 1% agarose Tris/borate/EDTA gel at 105 V for 1 h, using ethidium bromide to visualize the DNA.

### High-throughput sequencing

The nine DNA samples (total leaf DNA containing nuclear, chloroplast, and mitochondrial DNAs) were sent to the Génome Québec Innovation Centre for sequencing. All the steps for the

next-generation sequencing were performed at the Innovation Center. The DNA from all nine samples was fragmented to an average size of 308 bp, barcoded, and loaded on a single lane of an Illumina HiSeq 2000 PE100. The total number of bases for each of the samples varied from 3.4 Gb to 4.3 Gb. The portion of the reads that aligned to the chloroplast genome in these data sets varied between 5.8% and 15.3%, representing a coverage of between 1700× and 4500× of the chloroplast genomes (Supplementary Data S1). One sample (the one from Namibia) was also sequenced in five PacBio SMRT cells, giving a total of 1.78 Gb of sequence. Of this sequence, 1.66 Gb was in reads >3 kb (Supplementary Data S1). The proportion of reads that align to chloroplast sequences in this data set (4.8%) was similar to that for the Illumina sequencing data.

### Chloroplast genome assembly

Using the i-Plant Discovery Environment (now named Cyverse), the paired end reads were aligned to 29 chloroplast genomes (given in Supplementary Table S1 at *JXB* online) using bowtie2 (Langdon, 2015). The mapped reads were outputted to fastq files, which were interlaced and then concatenated. Duplicates were removed using prinseq-lite.

The mapped reads were assembled *de novo* using ABySS (<http://www.bcgsc.ca/platform/bioinfo/software/abyss>). The ABySS assembly gave contigs up to 73 kb in length, which were used for elongating and scaffolding. DBG2OLC (Ye *et al.*, 2014) was used for elongating contigs using the Illumina contigs as anchors to build overlap graphs using PacBio reads. The results still did not result in a complete contiguous chloroplast assembly. Therefore, the PacBio reads were converted into a Blast database in Genious version 9 and used to identify reads that crossed the remaining gaps in the assembly. The consensus sequences for each region were extracted and used to generate a version of the complete assembled chloroplast. All the Illumina reads from the same sample used for the PacBio sequence were aligned to the new assembly and the assembled sequence corrected for any ambiguities identified. The procedure was reiterated until there were no ambiguities in the alignment of the Illumina reads. This was considered the final sequence of the chloroplast of this individual marama plant. The junctions of the inverted repeat regions were mapped using the PacBio reads across the putative junctions, with the exact position of the junction being readily apparent by a break in the sequence between the two ends of the inverted repeat.

The other eight Illumina genomic read data sets (all from the University of Pretoria plants) were then aligned to this chloroplast assembly (Supplementary data S1). All of these eight samples were identical to each other, but different from that for the Namibian sample. A second chloroplast molecule, typical of the South African samples, was also constructed. The genome from the initial assembly has been submitted to GenBank.

The PCRs were performed to verify the inversion. Pairs of primers were designed, using Primer 3, that would amplify across the two ends of the inversion if linear. The primers were: primer 1 Forward, TACCTAACATATTTTTTTT; primer 1Reverse, AATCGCCTTT CCTATTCTT; product size: 1101 bp; primer 2 Forward, CATCGGTCCACACAGTTGTC; primer 2Reverse, CCCTGTA GGAATCGGATGAA; product size: 1162 bp.

The amplifications were performed in 20 µl using Promega GoGreenTaq polymerase. The denaturation was performed at 94 °C for 2 min followed by 30 cycles of 94 °C for 20 s, 55 °C for 30 s, and 72 °C for 75 s, and a final 72 °C for 5 min. The products were separated on a 1.5% agarose gel in Tris–Borate–EDTA at 100 V.

### Chloroplast sequence analysis

Both assembled chloroplast molecules were annotated using CPGAVAS (<http://www.herbalgenomics.org/0506/cpgavas/analyzer/home>) and DOGMA ([http://dogma.cccb.utexas.edu/cgi-bin/new\\_user.cgi](http://dogma.cccb.utexas.edu/cgi-bin/new_user.cgi)). Both programs gave essentially the same set of genes and positions. Both of the chloroplast molecules were compared with various other published chloroplast genome sequences using Blastn, as well as being compared with each other.

### Phylogenetic analysis

The phylogenetic tree was determined using a set of 29 protein-coding genes that are present in all the families (*psb*, *matK*, *atpA*, *atpF*, *atpF*, *rpoB*, *psbD*, *psbC*, *psaB*, *psaA*, *ndhK*, *psbG*, *ndhC*, *atpE*, *atpB*, *rbcL*, *accD*, *cemA*, *petA*, *rpl20*, *psbB*, *petB*, *rpoA*, *ndhH*, *ndhA*, *ndhI*, *ndhG*, *ndhE*, and *ndhD*) from seven legumes, and *Arabidopsis thaliana* as the outgroup. The concatenated protein set was aligned in KAlign ([www.ebi.ac.uk/Tools/msa/kalign](http://www.ebi.ac.uk/Tools/msa/kalign)) and the alignment subsequently analyzed using MrBayes (Huelsenbeck and Ronquist, 2001; Ronquist and Huelsenbeck, 2003) in the Genious platform.

## Results

### Organization, gene content, and characteristics of the *T. esculentum* chloroplast

The complete chloroplast genome was determined for nine different individuals. The first compilation was from an individual collected in Namibia and was used as the standard sequence since DNA sequence data from both Illumina and PacBio sequencing were available. The initial build resulted in a circular chloroplast genome of 161 537 bp, that is organized in the expected form of a pair of inverted repeats separated by a large single-copy region and a small single-copy region (Fig. 1). This sequence and its annotation have been deposited in GenBank (accession no. KX792933). The circularity of the chloroplast molecule was confirmed using a synthetic genome crossing the end of the inverted repeat into the large single-copy region and aligning this to both the Illumina reads and the PacBio reads. In both cases, the number of reads across the junction was the same as the number for either end independently, confirming the circularity. It was also independently confirmed by PCR amplification using a pair of primers across the junction, and the correct sized fragment was amplified.

### Physical features of the *T. esculentum* chloroplast genome

The complete *T. esculentum* chloroplast genome was shown to be a typical circular molecule which encodes 161 537 nucleotides, comprised of the expected four regions, the large single-copy (LSC), the small single-copy (SSC), and the two inverted repeat regions (IRa and IRb) (Fig. 1). These four regions of the circular chloroplast genome occupy 86 112 bp for LSC, 13 630 bp for SSC, and 61 806 bp (30 903 bp each) for the set of inverted repeat regions (Table 1). The chloroplast genome is larger than that of *Acacia*, 158 724 bp (Williams *et al.*, 2015), and *Cercis*, 158 995 bp (<https://www.ncbi.nlm.nih.gov/nuccore/KF856619.1>), but contains a larger inverted repeat region and a shorter SSC region than either of these two species. The chloroplast genome sizes in legumes range from 175 489 nucleotides for *Inga leiocalycina* to 120 289 nucleotides for *Lathyrus odoratus* cultivar Cupani. All the smaller legume chloroplast genomes have lost one copy of the inverted repeat region.

The chloroplast of marama encodes 79 unique protein-coding genes, of which eight are duplicated in the inverted repeat region, 30 unique tRNA genes, of which seven are duplicated in the IR region, and four unique rRNA genes.

The categories of genes identified and their functions are given in Table 2. Eleven-protein coding genes that contained introns are listed in Table 3. None of these genes appear to be pseudogenes.

Consistent with the previous observations in the *Leguminosae*, the *rpl22* gene is absent from the *T. esculentum* plastid genome following an ancient transfer to the nuclear genome (Gantt *et al.*, 1991). In those legume species that have retained their inverted repeat, the inverted repeat runs ~450 bp into the *ycf1* gene (Williams *et al.* 2015). This is true for species closely related to marama including *Acacia ligulata* (437 bp), *Millettia pinnata* (446 bp) (Williams *et al.*, 2015), and *Cercis canadensis* (488 bp) (GenBank accession no. KF856619.1) genomes. However, the expanded inverted repeat in marama has resulted in the inclusion of the complete *ycf1* gene, which now is present intact in two copies.

### Unique inversion

The marama chloroplast genome appears to have a unique inversion, included in the LSC region, among the legumes. The inverted region is 7479 bp and includes the six genes *rbcL*, *accD*, *psaI*, *ycf4*, *cemA*, and *petA*. Five of the six genes associated with the inversion (all except *rbcL*) starting with *accD* are adjacent to the end of the 50 kb inversion in lupin. A major variation in the marama chloroplast genome with respect to other legumes is the altered location of the *rbcL* gene. The presence of the inversion has been confirmed using PCR with two sets of primers designed to amplify across the junctions of the inversion in marama (Fig. 2). The inversion region between the chloroplast genomes of marama and its closest relative among the species with a complete chloroplast genome sequence, *C. canadensis*, is shown in Fig. 3. When compared with all the other legume chloroplast genomes, this specific inversion is unique to marama. It also does not appear to be present in any of the other comparisons with non-legume chloroplasts that have been performed. An 11 kb fragment spanning the inversion was aligned to the complete chloroplast genomes of 11 non-legume dicotyledon species (*Artemisia frigida*, *Brassica juncea*, *Camellia pubicosta*, *Cucumis sativus*, *Gossypium bickii*, *Macadamia integrifolia*, *Mesembryanthemum crystallinum*, *Nicotiana tabacum*, *Populus euphratica*, *Prunus persica*, and *Solanum tuberosum*) and one monocot species (*Hordeum vulgare*).

The break point for the 50 kb inversion clade in the legumes is between the *accD* gene and the *rbcL* gene (Martin *et al.*, 2014). This break point results in the *accD* gene not being moved, while the inversion in marama includes the *accD* gene in the inverted segment. Therefore, this region of the chloroplast genome in legumes is involved in rearrangements more frequently than in other plants, where it appears to be collinear in the other dicotyledon species and the single monocotyledon species. No obvious structural elements were detected at the junctions of the inversion such as direct or inverted repeats across regions where the ends of the inversion should reside. The break points do not disrupt any genes.

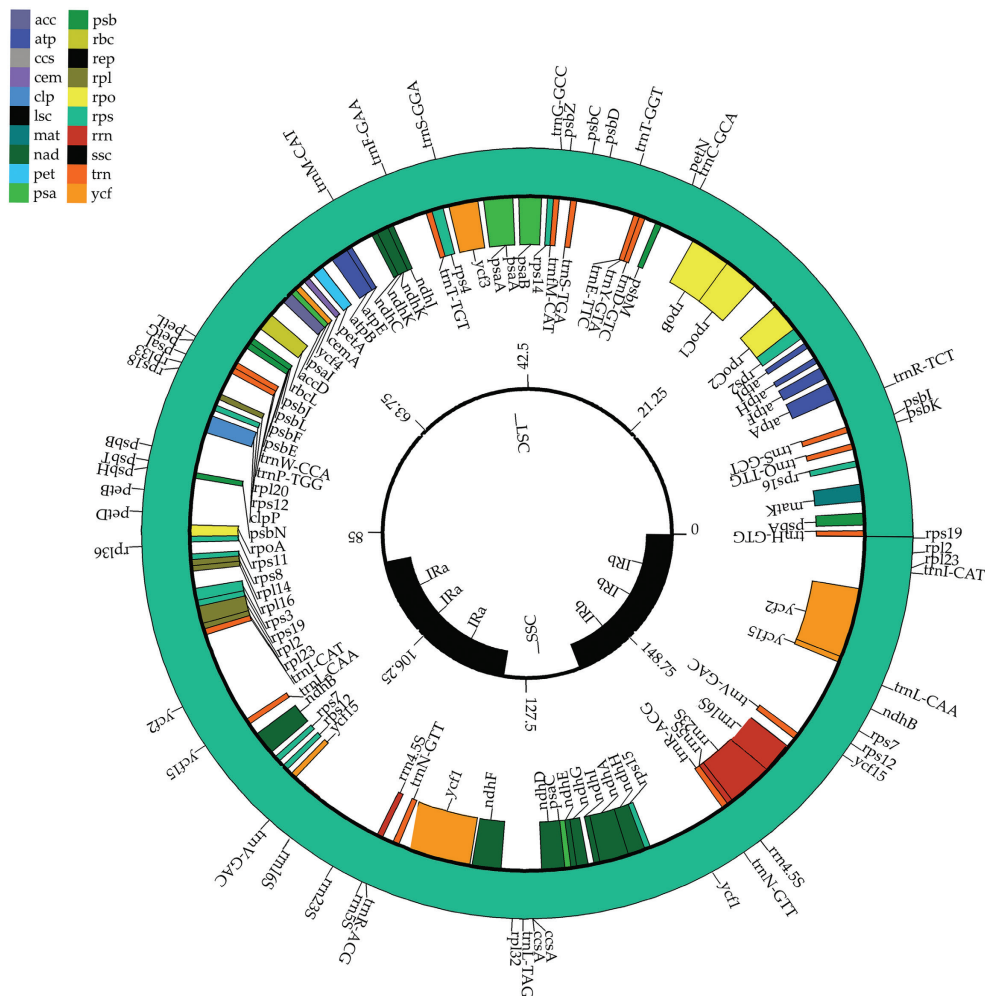

The functions of various genes are color-coded

| Functions                 | Family name                               | Code |
|---------------------------|-------------------------------------------|------|
| Other genes               | Subunit of acetyl-CoA-carboxylase         | acc  |
| Other genes               | c-type cytochrome synthesis gene          | ces  |
| Other genes               | Envelope membrane protein                 | cem  |
| Other genes               | Protease                                  | clp  |
| Other genes               | Maturase                                  | mat  |
| Genes for photosynthesis  | Subunits of ATP synthase                  | atp  |
| Genes for photosynthesis  | Subunits of NADH-dehydrogenase            | nad  |
| Genes for photosynthesis  | Subunit of Rubisco                        | rbc  |
| Genes for photosynthesis  | Subunits of cytochrome <i>b/f</i> complex | pet  |
| Genes for photosynthesis  | Subunits of PSI                           | psa  |
| Genes for photosynthesis  | Subunits of PSII                          | psb  |
| Self-replication          | Large subunit of ribosome                 | rpl  |
| Self-replication          | DNA-dependent RNA polymerase              | rpo  |
| Self replication          | Small subunit of ribosome                 | rps  |
| Self-replication          | rRNA genes                                | rrn  |
| Self-replication          | tRNA genes                                | trn  |
| Genes of unknown function | Conserved ORFs                            | ycf  |
| Small single-copy region  |                                           | ssc  |
| Large single-copy region  |                                           | lsc  |
| Inverted repeat region    |                                           | rep  |

**Fig. 1.** Circular gene map of the *Tylosema esculentum* (Genistoid; Fabaceae) plastid genome. Genes are represented with boxes inside and outside the first circle to indicate a clockwise or counterclockwise transcription direction, respectively. Genes belonging to different functional groups are color coded. The locations of the different main plastomic regions (inverted repeats, large single copy, and small single copy) are indicated in the inner circle. The molecule was drawn through the analysis site <http://www.herbalgenomics.org/0506/cpgavas/analyzer/home>.

*Intraspecific variation in chloroplast sequence*

The chloroplast sequence diversity in the legumes has mainly been concentrated on the interspecific differences, with few data on intraspecific variation. The data reported here identify two distinct chloroplast genomes in *T. esculentum*. These two forms have >200 differences between them. Most of these differences are SNPs although there are also some indels. The positions of the 94 SNPs (three of which occur within the inverted repeats) are given in Supplementary Table S2. The data only represent a small sampling of the geographical diversity of marama. The origin between the

plants growing at the University of Pretoria farm is obscure and they may be related although they are phenotypically diverse. Additional sampling is currently underway, across many regions of the range, to determine the extent and distribution of the intraspecific chloroplast variation.

The SNP variants do not affect the coding capacity of the marama chloroplast genome. Seventy of the 94 SNPs are in non-coding regions. The effects of the remaining 24 SNPs in coding regions were tested by translating the two alternative sequences and comparing the two resulting amino acid sequences using blast. In every case, the two alternatives resulted in the same protein sequence and therefore the polymorphisms do not affect the protein sequences.

Intraspecific variation in chloroplast genomes has been described in legumes, initially through changes in restriction enzyme recognition sites (Lavin *et al.*, 1991) and more recently through whole-genome sequencing (Lei *et al.*, 2016). The whole-genome sequence analysis for *Astragalus membranaceus* mainly identified insertion/deletions in five hypervariable regions. In rice Wei Tong *et al.* (2016), have identified 3677 variations across 383 rice accessions from diverse origins. However, the level of variation between any two varieties is not explicitly identified so cannot be compared with the level of variation identified in marama here.

**Table 1.** Summary of chloroplast genome characteristics of marama

|                                         |         |
|-----------------------------------------|---------|
| Total size (bp)                         | 161 537 |
| LSC size in bp                          | 86 113  |
| SSC size in bp                          | 13 630  |
| IR length in bp                         | 30 897  |
| Size of coding regions in bp            | 101 241 |
| Size of protein-coding regions in bp    | 80 218  |
| Size of rRNA in bp                      | 10 282  |
| Size in bp of tRNA                      | 10 741  |
| Size in bp of intergenic regions        | 60 296  |
| No. of different genes                  | 125     |
| No. of different protein-coding genes   | 79      |
| No. of different tRNA genes             | 30      |
| No. of different rRNA genes             | 4       |
| No. of different genes duplicated by IR | 17      |
| No. of different genes with introns     | 22      |
| Overall % GC content                    | 36.13%  |
| % GC content in protein-coding regions  | 37.5%   |
| % GC content in IGSs                    | 31.16%  |
| % GC content in rRNA                    | 54.6%   |
| % GC content in tRNA                    | 43.4%   |

*Taxonomic relationships based on complete chloroplast genome sequences*

The taxonomic relationships within the legumes are well established, especially for those species of agronomic importance, using chloroplast genomes, or subsets of common genes, as the basis for comparison (Martin *et al.*, 2014; Lei *et al.*, 2016). Here, the relationship between marama and other chloroplast genomes has been determined using

**Table 2.** Coding regions of the marama chloroplast

| Family name                       | List of genes                                                                                                                                                                                                                                                                                                                                                                                                                                                                                       |
|-----------------------------------|-----------------------------------------------------------------------------------------------------------------------------------------------------------------------------------------------------------------------------------------------------------------------------------------------------------------------------------------------------------------------------------------------------------------------------------------------------------------------------------------------------|
| rRNAs                             | 16S ( <i>rrn16</i> ) (×2), 23S ( <i>rrn23</i> ) (×2) 4.5S ( <i>rrn4.5</i> ) (×2), 5S ( <i>rrn5</i> ) (×2)                                                                                                                                                                                                                                                                                                                                                                                           |
| tRNAs                             | tRNA-His(GTG), tRNA-Lys(TTT), tRNA-Gln(TTG), tRNA-Ser(GCT), tRNA-Thr(CGT), tRNA-Arg(TCT), tRNA-Cys(GCA), tRNA-Asp(GCT), tRNA-Tyr(GTA), tRNA-Glu(TTC), tRNA-Thr(GGT), tRNA-Ser(TGA), tRNA-Gly(GCC), tRNA-Met(CAT), tRNA-Ser(GGA), tRNA-Thr(TGT), tRNA-Leu(TAA), tRNA-Phe(GAA), tRNA-Ile(AAT), tRNA-Met(CAT), tRNA-Trp(CCA), tRNA-Pro(TGG), tRNA-Met(CAT) (×2), tRNA-Leu(CAA) (×2), tRNA-Val(GAC) (×2), tRNA-Glu(TTC) (×2), tRNA-Ala(TGC) (×2), tRNA-Arg(ACG) (×2), tRNA-Asn(GTT) (×2), tRNA-Leu(TAG) |
| Small subunit of ribosome         | <i>rps2, rps3, rps4, rps7</i> (×2), <i>rps8, rps11, rps12</i> (×2, part), <i>rps14, rps15, rps16, rps18, rps19</i>                                                                                                                                                                                                                                                                                                                                                                                  |
| Large subunit of ribosome         | <i>rpl2</i> (×2), <i>rpl14, rpl16, rpl20, rpl23</i> (×2), <i>rpl32, rpl33, rpl36</i>                                                                                                                                                                                                                                                                                                                                                                                                                |
| RNA polymerase                    | <i>rpoA, rpoB, rpoC1, rpoC2</i>                                                                                                                                                                                                                                                                                                                                                                                                                                                                     |
| NADH-dehydrogenase                | <i>ndhA, ndhB</i> (×2), <i>ndhC, ndhD, ndhE, ndhF, ndhG, ndhH, ndhI, ndhJ, ndhK</i>                                                                                                                                                                                                                                                                                                                                                                                                                 |
| PSI                               | <i>psaA, psaB, psaC, psal, psaj, ycf3</i> (×2)                                                                                                                                                                                                                                                                                                                                                                                                                                                      |
| PSII                              | <i>lhba, psbA, psbC, psbD, psbE, psbF, psbH, psbl, psbj, psbk, psbl, psbm, psbn, psi-psbT, psbT</i>                                                                                                                                                                                                                                                                                                                                                                                                 |
| Cytochrome <i>b/f</i>             | <i>petA, petB, petD, petG, petL, petN</i>                                                                                                                                                                                                                                                                                                                                                                                                                                                           |
| ATP synthase                      | <i>atpA, atpB, atpE, atpF, atpH, atpI</i>                                                                                                                                                                                                                                                                                                                                                                                                                                                           |
| Rubisco                           | <i>rbcl</i>                                                                                                                                                                                                                                                                                                                                                                                                                                                                                         |
| Subunit of acetyl-CoA-carboxylase | <i>accD</i>                                                                                                                                                                                                                                                                                                                                                                                                                                                                                         |
| Others                            | <i>matK, clpP, cemA, ccsA</i>                                                                                                                                                                                                                                                                                                                                                                                                                                                                       |
| Unknown function ORFs             | <i>ycf1</i> (×2), <i>ycf2</i> (×2), <i>ycf4, ycf15, ycf68</i>                                                                                                                                                                                                                                                                                                                                                                                                                                       |

**Table 3.** The lengths of introns and exons for the splitting genes

| Gene         | Strand | Start   | End     | Exon I | Intron I | Exon II | Intron II | Exon III |
|--------------|--------|---------|---------|--------|----------|---------|-----------|----------|
| <i>atpF</i>  | -      | 12 120  | 13 437  | 148    | 709      | 461     |           |          |
| <i>rpoC1</i> | -      | 21 208  | 24 065  | 437    | 800      | 1621    |           |          |
| <i>psaA</i>  | -      | 41 327  | 43 468  | 1788   | 30       | 324     |           |          |
| <i>ycf3</i>  | -      | 44 330  | 46 381  | 127    | 716      | 230     | 829       | 150      |
| <i>accD</i>  | -      | 60 367  | 61 305  | 238    | 120      | 581     |           |          |
| <i>clpP</i>  | -      | 71 533  | 72 885  | 299    | 837      | 217     |           |          |
| <i>rpl2</i>  | -      | 86 463  | 87 955  | 394    | 632      | 467     |           |          |
| <i>ndhB</i>  | -      | 96 955  | 99 163  | 870    | 586      | 753     |           |          |
| <i>ndhA</i>  | -      | 126 748 | 129 120 | 552    | 1263     | 558     |           |          |
| <i>ndhB</i>  | +      | 148 488 | 150 699 | 867    | 589      | 756     |           |          |
| <i>rpl2</i>  | +      | 159 696 | 161 191 | 391    | 635      | 470     |           |          |

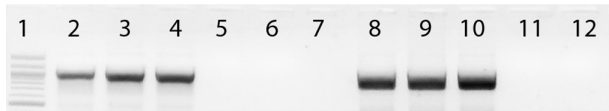

**Fig. 2.** Amplification across the two ends of the inversion confirming the arrangement of the sequences as assembled. DNAs from three different marama plants and from lupin as a control were used. Lane 1, New England Biolabs 100 bp ladder (bands visible at 1517, 1200, 1000, 900, 800, 700, 600, and 500 bp); lane 2, marama DNA; lane 3, marama DNA; lane 4, marama DNA; lane 5, lupin DNA; lane 6, water; lane 7, blank; lane 8, marama DNA; lane 9, marama DNA; lane 10, marama DNA; lane 11, lupin DNA; lane 12, water. The products in lanes 2–6 were amplified with primers 1Forward and 1Reverse, while those in lanes 8–12 were amplified with primers 2Forward and 2Reverse.

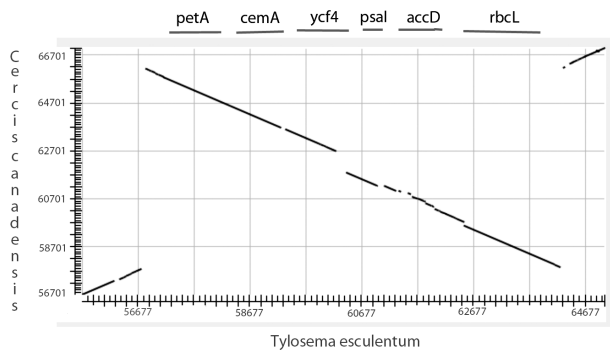

**Fig. 3.** Alignment of the sequences from marama and *Cercis canadensis* chloroplast genomes covering the inversion region. The respective regions of the chloroplasts were aligned using Blastn (megablast) for high similarity. Note, not only the inversion but the differences in sequences across this region. The organization of the protein-coding genes is shown. The axes are labeled with the nucleotide positions in the chloroplast molecules, for marama the new genome and for *Cercis* the genome available at NCBI (KF856619.1).

both the complete chloroplast genomes and a subset of the protein-coding regions. The phylogenetic tree shown in Fig. 4 was determined using a set of 29 protein-coding genes (*psb*, *matK*, *atpA*, *atpF*, *rpoB*, *psbD*, *psbC*, *psaB*, *psaA*, *ndhK*, *psbG*, *ndhC*, *atpE*, *atpB*, *rbcL*, *accD*, *cemA*, *petA*, *rpl20*, *psbB*, *petB*, *rpoA*, *ndhH*, *ndhA*, *ndhI*, *ndhG*, *ndhE*, and *ndhD*) that are present in all the families. The concatenated protein set was aligned in KAlign ([www.ebi.ac.uk/Tools/](http://www.ebi.ac.uk/Tools/)

[msa/kalign](#)) and the alignment subsequently analyzed using MrBayes (Huelsenbeck and Ronquist, 2001; Ronquist and Huelsenbeck, 2003) in the Genius platform. As expected, *C. canadensis* was the most closely related species to *T. esculentum*, with the other species following the previously determined pattern of relationships (Martin *et al.*, 2014) in this analysis.

### Discussion

The assembly of the chloroplast genome from *T. esculentum* has highlighted differences in the organization of a member of the basal legumes. The major differences that have been identified include the presence of a specific inversion that has not been found in any of the legume chloroplasts sequenced to date, an expansion of the inverted repeat to include a complete copy of the *ycf1* gene, and the identification of at least two different chloroplast genomes. It would be interesting to characterize this region in *Bauhinia* species to determine if the inversion is specific to the *Tylosema* or is present in all the members of this clade.

Since the emergence of the Fabaceae, there has been loss of five different chloroplastic genes: *accD*, *psaI*, *rpl23*, *rps16*, and *ycf4* (Jansen *et al.*, 2007; Magee *et al.*, 2010). In *Tylosema*, all of these genes are present. As would be expected, all of these genes are also present in the *C. canadensis* chloroplast genome, which is the most closely related species with a complete chloroplast genome available.

The intraspecific variation in the marama chloroplast genome is being investigated through whole-genome sequencing of individuals from various regions of Namibia to determine whether there are more examples of intraspecific variation and whether any such variants are geographically isolated. This next set of data will illuminate the extent of the intraspecific variation. Since the geographical origin of the samples being sequenced is known, the new data should also identify any gene flow and distribution of seeds across the region. The presence of specific chloroplast genomes in particular regions would suggest that the seeds are not widely distributed, while a mixture of genomes across all regions would indicate a wide distribution of the seeds and/or pollen.

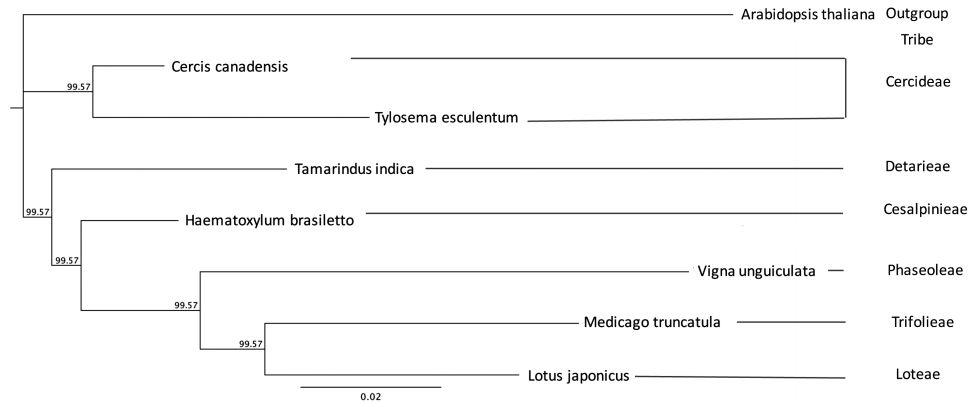

**Fig. 4.** Phylogenetic relationships. Twenty-nine proteins (psb, matK, atpA, atpF, rpoB, psbD, psbC, psaB, psaA, ndhK, psbG, ndhC, atpE, atpB, rbcL, accD, cemA, petA, rpl20, psbB, petB, rpoA, ndhH, ndhA, ndhI, ndhG, ndhE, and ndhD) were identified from the available chloroplast genomes of *Arabidopsis thaliana* (AP000423.1), *Cercis canadensis* (KF856619.1), *Haematoxylum brasiletto* (NC\_026679), *Lotus japonicus* (NC\_002694.1), *Medicago truncatula* (NC\_003119.6), *Tamarindus indica* (NC\_026685), *Tylosema esculentum* (KX792933), and *Vigna unguiculata* (NC\_018051.1) in NCBI and concatenated. The protein sets were aligned in KAlign and then their relationship tree determined by MrBayes.

## Supplementary data

Supplementary data are available at *JXB* online.

Table S1. The chloroplast genomes used to extract marama chloroplast-specific sequences from whole-genome sequence data.

Table S2. The positions of the identified SNPs within the chloroplast genome.

Data S1. The alignment statistics from Bowtie2 for the Illumina reads against the final assembled chloroplast genome.

## Acknowledgements

YK was supported by a summer undergraduate award from the Ogelbay fund. The students in BIOL301/401 in 2015 contributed by extracting the DNA from some of the samples. Support for the next-generation sequencing in this work has been from a Nord Grant to Dr Peter Zimmerman and the Department of Biology for the course BIOL301/401. Dr P. Chimwamurombe and Dr M. Takundwa supplied the seed from Namibia, and Dr J. Vorster and Dr K. Kunert the seeds from the University of Pretoria.

## References

- Banks H, Forest F, Lewis G.** 2013. Palynological contribution to the systematics and taxonomy of *Bauhinia* s.l. (Leguminosae: Cercideae). *South African Journal of Botany* **89**, 219–226.
- Chimwamurombe PM.** 2008. ABS and creation of an enabling environment for innovation, is it an issue for SADC countries? Marama bean domestication: an ABS case. *Building Bridges* **3**, 5–7.
- Doyle JJ, Doyle JL, Ballenger JA, Palmer JD.** 1996. The distribution and phylogenetic significance of a 50-kb chloroplast DNA inversion in the flowering plant family Leguminosae. *Molecular Phylogenetics and Evolution* **5**, 429–438.
- Dugas DV, Hernandez D, Koenen EJ, et al.** 2015. Mimosoid legume plastome evolution: IR expansion, tandem repeat expansions, and accelerated rate of evolution in clpP. *Scientific Reports* **5**, 16958.
- Gantt JS, Baldauf SL, Calie PJ, Weeden NF, Palmer JD.** 1991. Transfer of rpl22 to the nucleus greatly preceded its loss from the chloroplast and involved the gain of an intron. *EMBO Journal* **10**, 3073–3078.
- Hao G, Zhang D-X, Zhang M-Y, Guo L-X, Li S-J.** 2003. Phylogenetics of *Bauhinia* subgenus *Phanera* (Leguminosae: Caesalpinioideae) based on

ITS sequences of nuclear ribosomal DNA. *Botanical Bulletin of Academia Sinica* **44**, 223–238.

**Huelsenbeck JP, Ronquist F.** 2001. MRBAYES: Bayesian inference of phylogenetic trees. *Bioinformatics* **17**, 754–755.

**Jansen RK, Cai Z, Raubeson LA, et al.** 2007. Analysis of 81 genes from 64 plastid genomes resolves relationships in angiosperms and identifies genome-scale evolutionary patterns. *Proceedings of the National Academy of Sciences, USA* **104**, 19369–19374.

**Jansen RK, Ruhlman TA.** 2012. *Plastid genomes of seed plants*. In: Bock R, Knoop V, eds. *Genomics of chloroplasts and mitochondria*. Dordrecht: Springer, 103–126.

**Langdon WB.** 2015. Performance of genetic programming optimised Bowtie2 on genome comparison and analytic testing (GCAT) benchmarks. *BioData Mining* **8**, 1.

**Lavin M, Mathews S, Hughes C.** 1991. Chloroplast DNA variation in *Gliricidia sepium* (Leguminosae): intraspecific phylogeny and Tokogeny. *American Journal of Botany* **78**, 1576–1585.

**Lei W, Ni D, Wang Y, Shao J, Wang X, Yang D, Wang J, Chen H, Liu C.** 2016. Intraspecific and heteroplasmic variations, gene losses and inversions in the chloroplast genome of *Astragalus membranaceus*. *Scientific Reports* **6**, 21669.

**Magee AM, Aspinnall S, Rice DW, et al.** 2010. Localized hypermutation and associated gene losses in legume chloroplast genomes. *Genome Research* **20**, 1700–1710.

**Martin GE, Rousseau-Gueutin M, Cordonnier S, et al.** 2014. The first complete chloroplast genome of the Genistoid legume *Lupinus luteus*: evidence for a novel major lineage-specific rearrangement and new insights regarding plastome evolution in the legume family. *Annals of Botany* **113**, 1197–1210.

**National Research Council.** 1996. *Lost crops of Africa*. Washington, DC: National Academy Press.

**Nepolo E, Takundwa M, Chimwamurombe PM, Cullis CA, Kunert K.** 2009. A review of geographical distribution of marama bean [*Tylosema esculentum* (Burchell) Schreiber] and genetic diversity in the Namibian germplasm. *African Journal of Biotechnology* **8**, 2088–2093.

**Nepolo E, Chimwamurombe PM, Cullis CA, Kandawa-Schulz MA.** 2010. Determining genetic diversity based on ribosomal intergenic spacer length variation in Marama bean (*Tylosema esculentum*) from the Omipanda area Eastern Namibia. *African Journal of Plant Science* **4**, 368–373.

**Ronquist F, Huelsenbeck JP.** 2003. MRBAYES 3: Bayesian phylogenetic inference under mixed models. *Bioinformatics* **19**, 1572–1574.

**Takundwa M, Chimwamurombe PM, Kunert K, Cullis CA.** 2010. Isolation and characterization of microsatellite repeats in Marama bean (*Tylosema esculentum*). *African Journal of Agricultural Research* **5**, 561–566.

**Takundwa M, Chimwamurombe PM, Kunert K, Cullis CA.** 2012. Developing DNA barcoding (*matK*) primers for marama bean [*Tylosema esculentum* (Burchell) Schreiber]. *African Journal of Biotechnology* **11**, 16305–16312

**Wei Tong W, Tae-Sung Kim T-S, Park Y-J.** 2016. Rice chloroplast genome variation architecture and phylogenetic dissection in diverse *Oryza* species assessed by whole-genome resequencing. *Rice (NY)* **9**, 57.

**Williams AV, Boykin LM, Howell KA, Nevill PG, Small I.** 2015. Correction: The complete sequence of the *Acacia ligulata* chloroplast genome reveals a highly divergent *clpP1* gene. *PLoS One* **10**, e0138367.

**Wunderlin RP.** 2010. Reorganization of the Cercideae (Fabaceae: Caesalpinioideae). *Phytoneuron* **48**, 1–5

**Ye C, Hill CM, Wu S, Ruan J, Ma S.** 2016. DBG2OLC: efficient assembly of large genomes using long erroneous reads of third generation sequencing technologies. *Scientific Reports* **6**, 31900.
